# Supplementary material for: Transcript splicing optimizes the thymic self-antigen repertoire to suppress autoimmunity
Source: PubMed Central journal article supplement (PMC11473167; doi:10.1172/jci179612), 2024-10-15
Supplement: jci-134-179612-s115.pdf [file jci-134-179612-s115.pdf]

Full unedited gels for Figure 1I

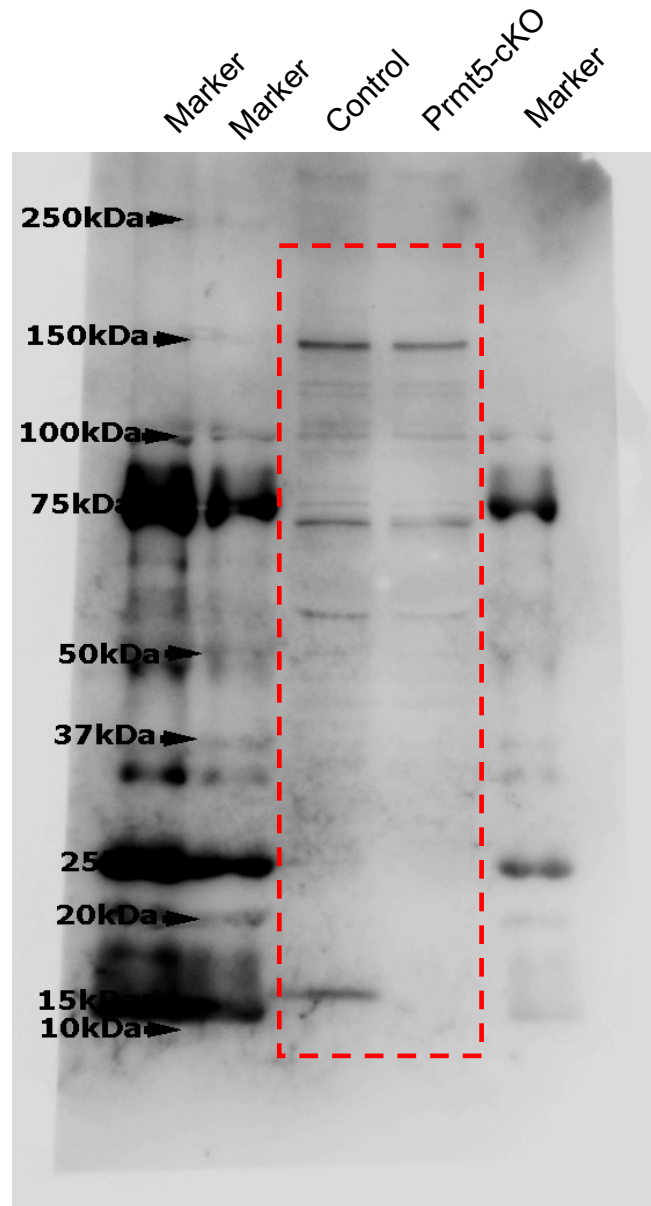

IB: sDMA

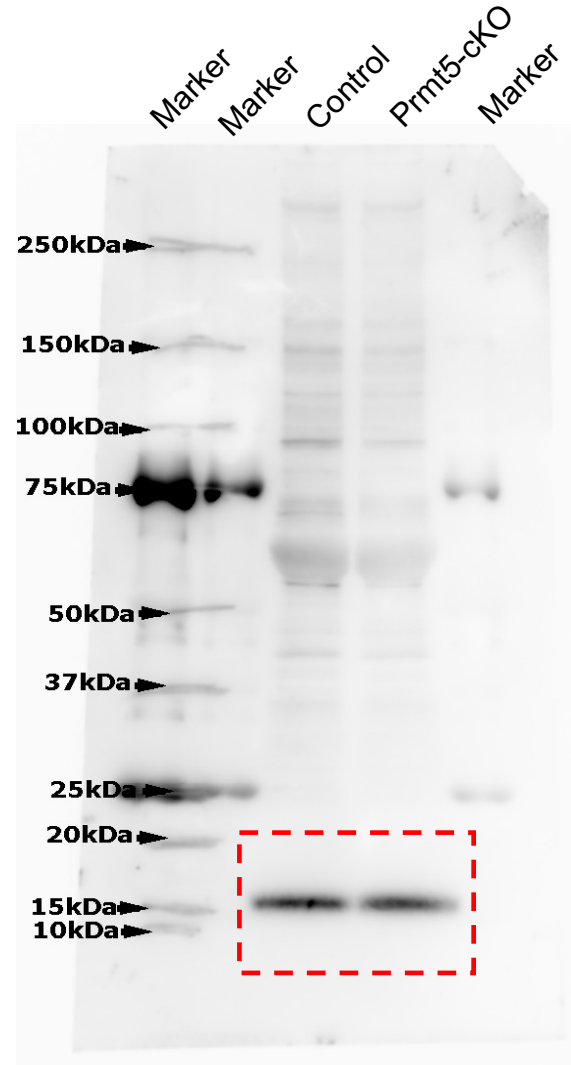

IB: smD3

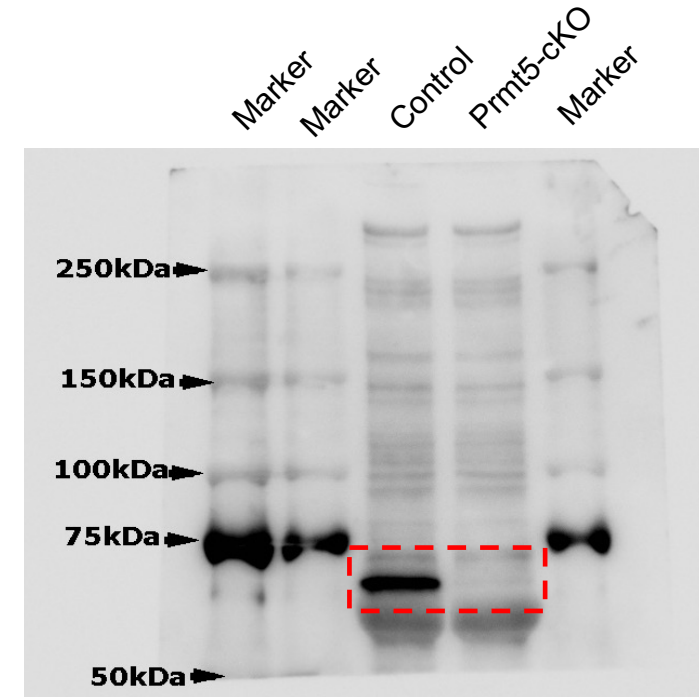

IB: Prmt5

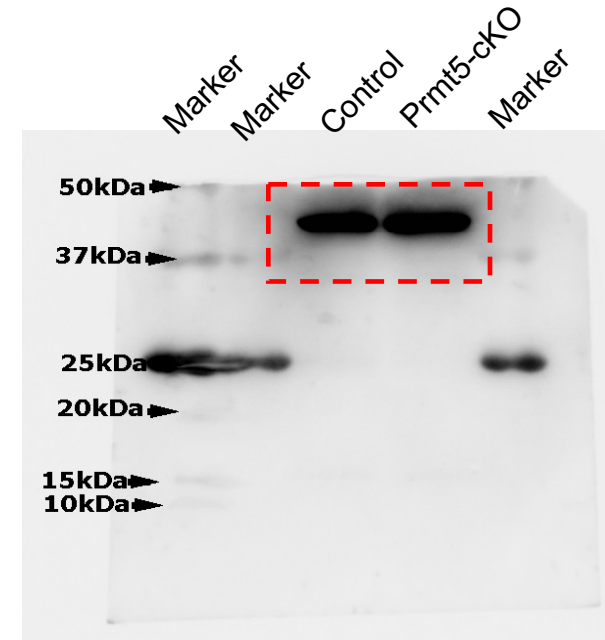

IB:  $\beta$ -actin

Full unedited gels for Figure 4F

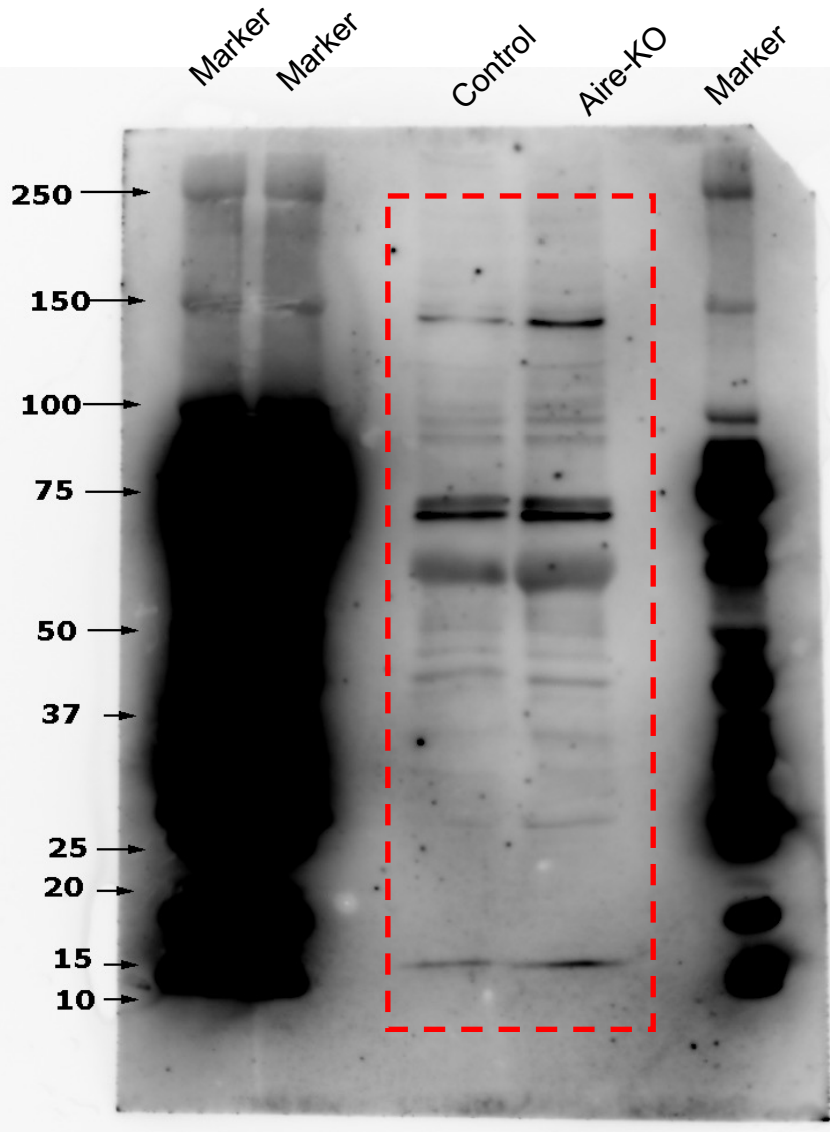

IB: sDMA

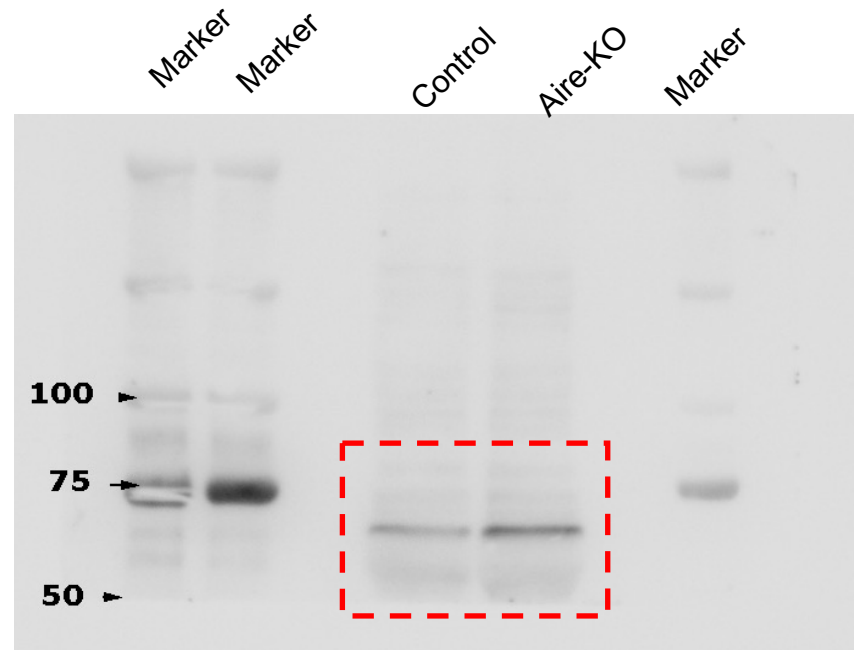

IB: Prmt5

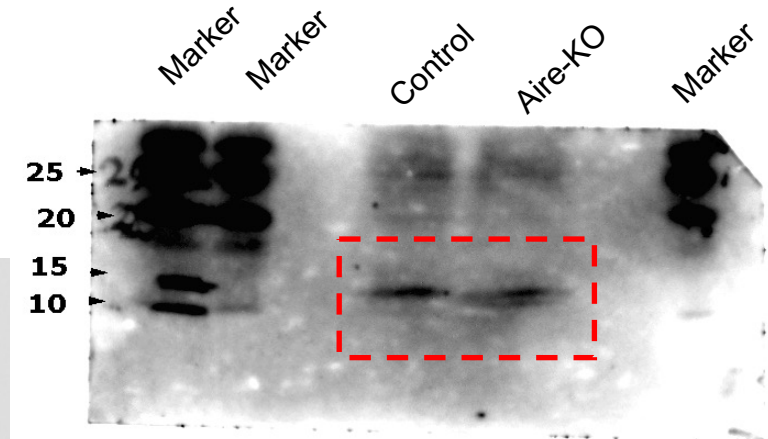

IB: SmD3

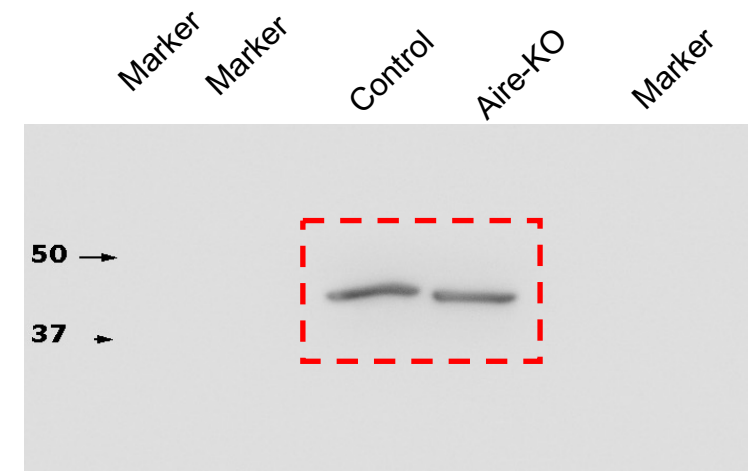

IB:  $\beta$ -actin

# Full unedited gels for Figure 2F

Control      Prmt5-cKO  
25 30 35    25 30 35    cycles

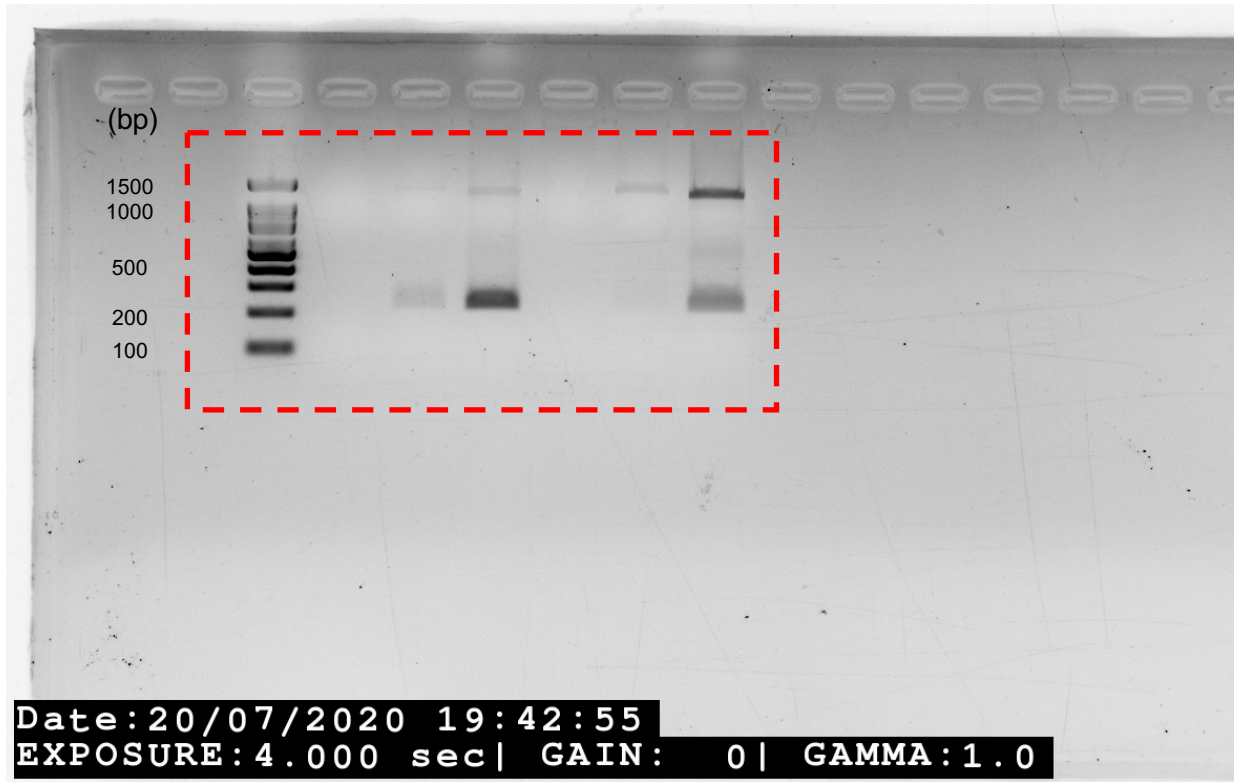

Aire

Control      Prmt5-cKO  
25 30 35    25 30 35    cycles

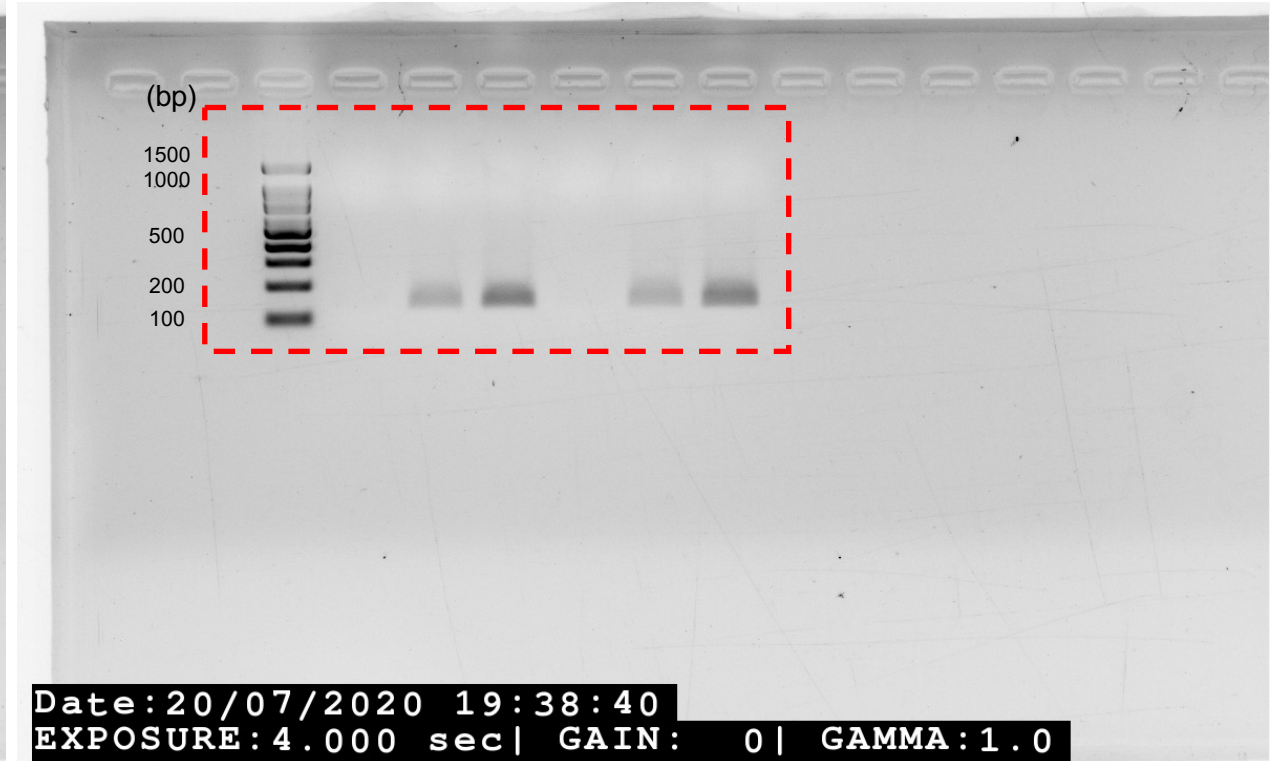

Gapdh



# Full unedited gels for Supplemental Figure 5C

Control    Prmt5-cKO  
34 37    34 37    cycles

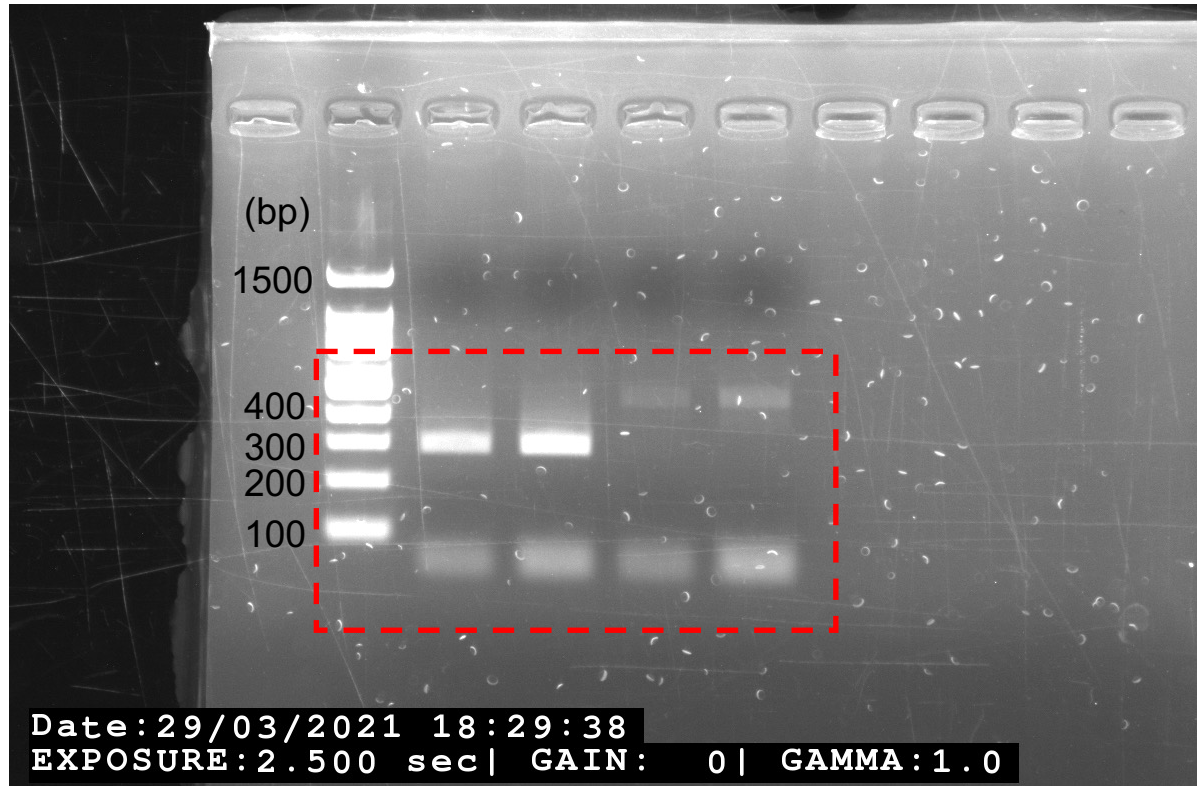

Ano9

Control    Prmt5-cKO  
30 35    30 35    cycles

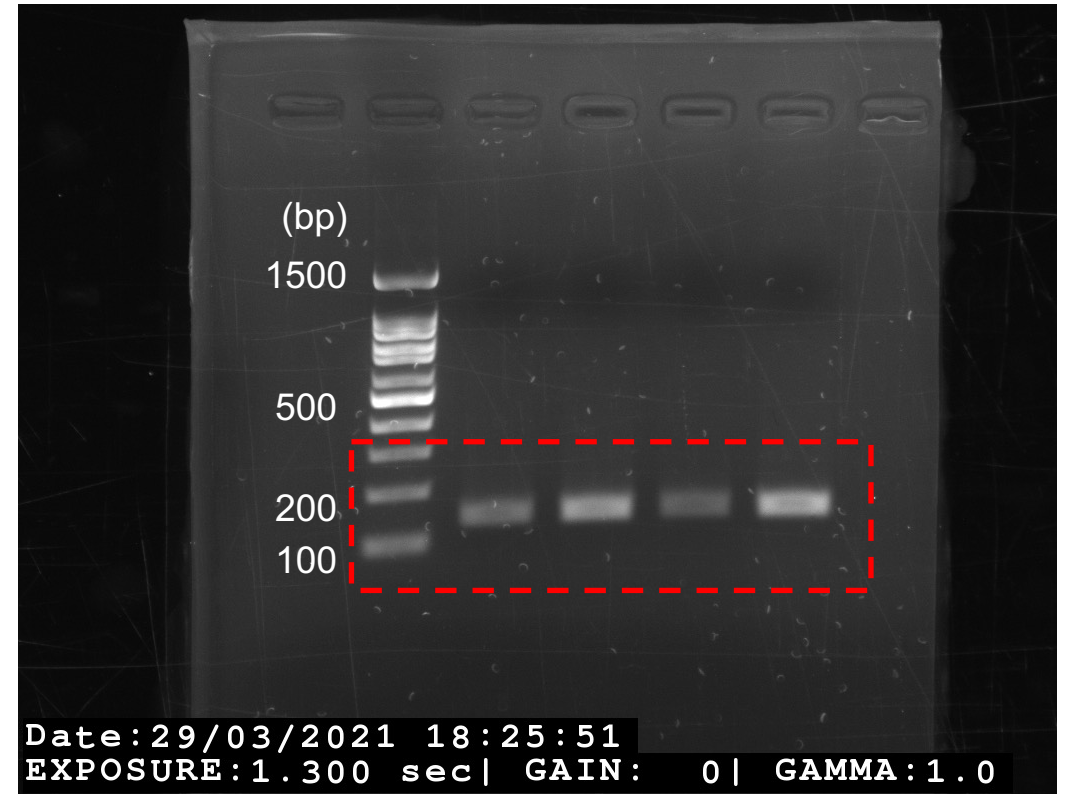

Gapdh
